# Supplementary material for: Microwave-Assisted Synthesis of Potential Bioactive Benzo-, Pyrido- or Pyrazino-thieno[3,2-d]pyrimidin-4-amine Analogs of MPC-6827
Source: Pharmaceuticals (Basel). 2020 Aug 19;13(9):202. doi: 10.3390/ph13090202 (PMC7558077; doi:10.3390/ph13090202)
Supplement: Supplementary file 1 [file pharmaceuticals-13-00202-s001.pdf]

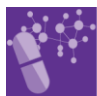

# Supplementary Materials

Communication

## Synthesis of Thieno[3,2-*d*]pyrimidine Analogs of MPC-6827 and Antiproliferative Activity on HT-29 and Caco-2 Colorectal Cancer Cells

Yvonnick Loidreau <sup>1</sup>, Marie-Renée Nourrisson <sup>2</sup>, Corinne Fruit <sup>1</sup>, Cécile Corbière <sup>3</sup>, Pascal Marchand <sup>2,\*</sup> and Thierry Besson <sup>1,\*</sup>

<sup>1</sup> Normandie Univ, UNIROUEN, INSA Rouen, CNRS, COBRA UMR 6014, 76000 Rouen, France; yvonnick.loidreau@gmail.com (Y.L.); corinne.fruit@univ-rouen.fr (C.F.)

<sup>2</sup> Université de Nantes, Cibles et médicaments des infections et du cancer, IICiMed, EA 1155, F-44000 Nantes, France; marie-renee.nourrisson@univ-nantes.fr (M.R.N.)

<sup>3</sup> Normandie Univ, UNIROUEN, ABTE, 76000 Rouen, France; cecile.corbiere@univ-rouen.fr (C.C.)

\* Correspondence: pascal.marchand@univ-nantes.fr; Tel.: +33 253-009-155 (P.M.); thierry.besson@univ-rouen.fr; Tel.: +33 235-522-904 (T.B.)

### 1. <sup>1</sup>H- & <sup>13</sup>C-NMR Spectra for Compounds 2a-2d, 3a-3d and 4a-4d

20 Figure S1. <sup>1</sup>H NMR at 300 MHz and <sup>13</sup>C NMR at 75.4 MHz spectra, DMSO-d<sub>6</sub>, for compound 2a.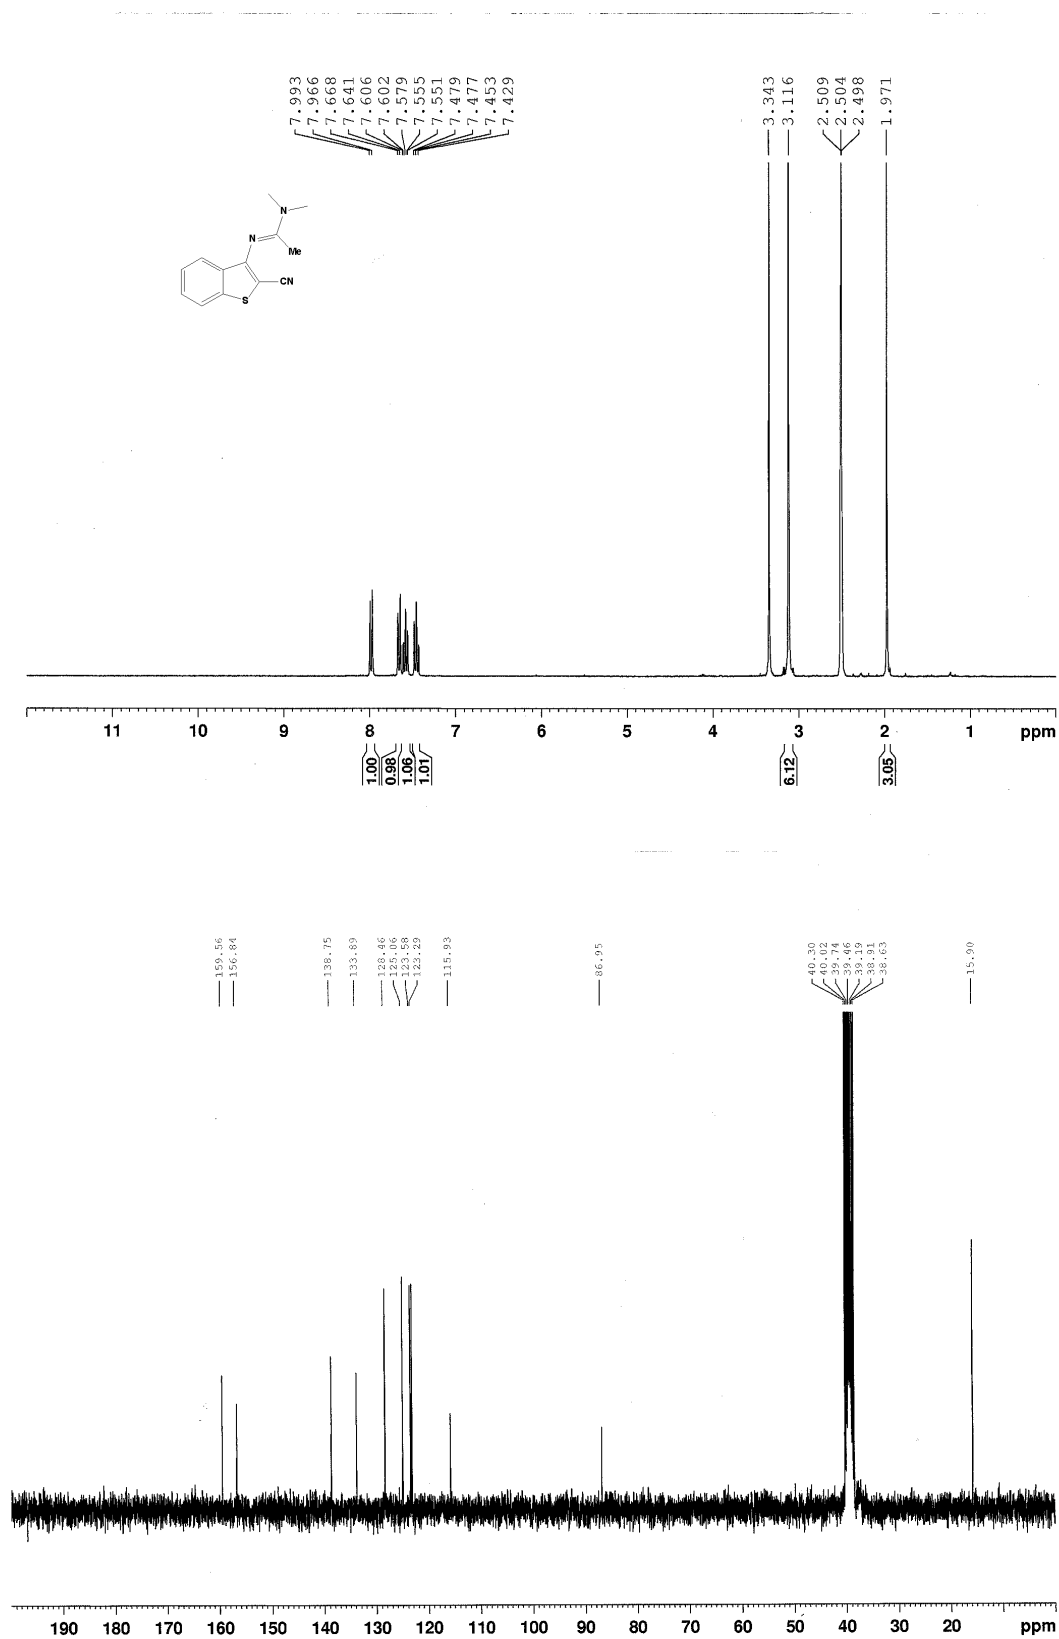

21

22

23 Figure S2. <sup>1</sup>H NMR at 300 MHz and <sup>13</sup>C NMR at 75.4 MHz spectra, DMSO-d<sub>6</sub>, for compound 2b.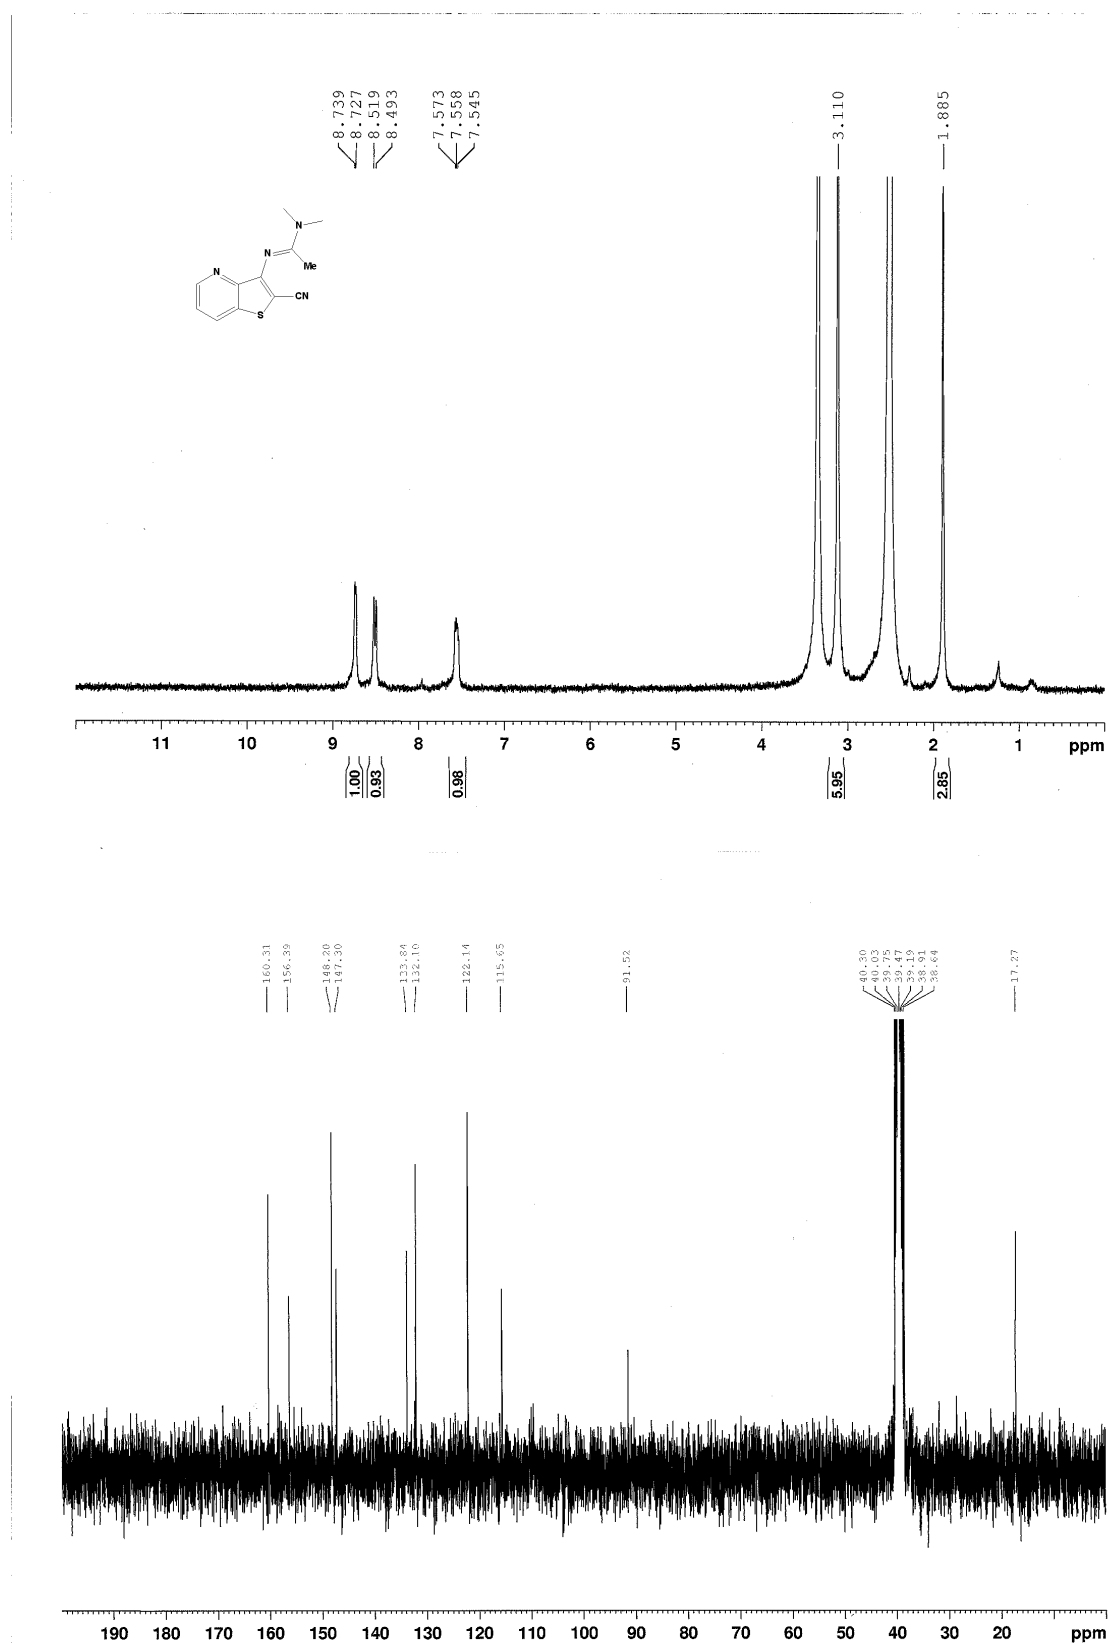

24

25

26 **Figure S3.** <sup>1</sup>H NMR at 300 MHz and <sup>13</sup>C NMR at 75.4 MHz spectra, DMSO-d<sub>6</sub>, for compound 2c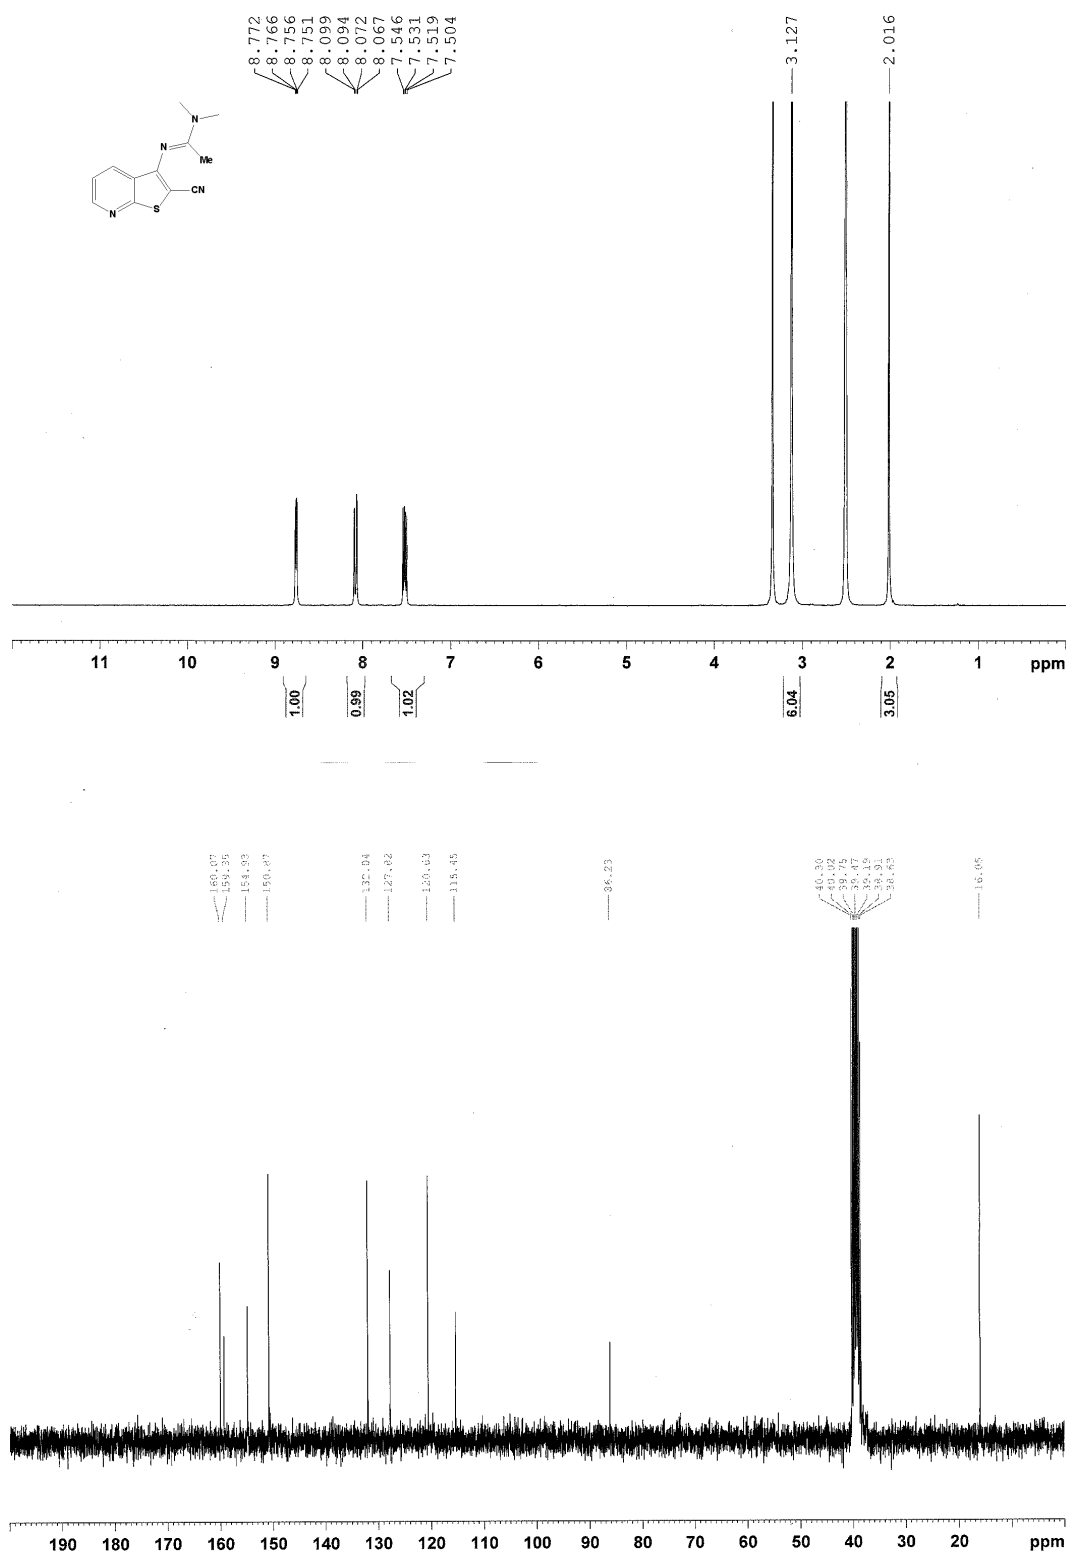

27

28

29 Figure S4. <sup>1</sup>H NMR at 300 MHz and <sup>13</sup>C NMR at 75.4 MHz spectra, DMSO-d<sub>6</sub>, for compound 2d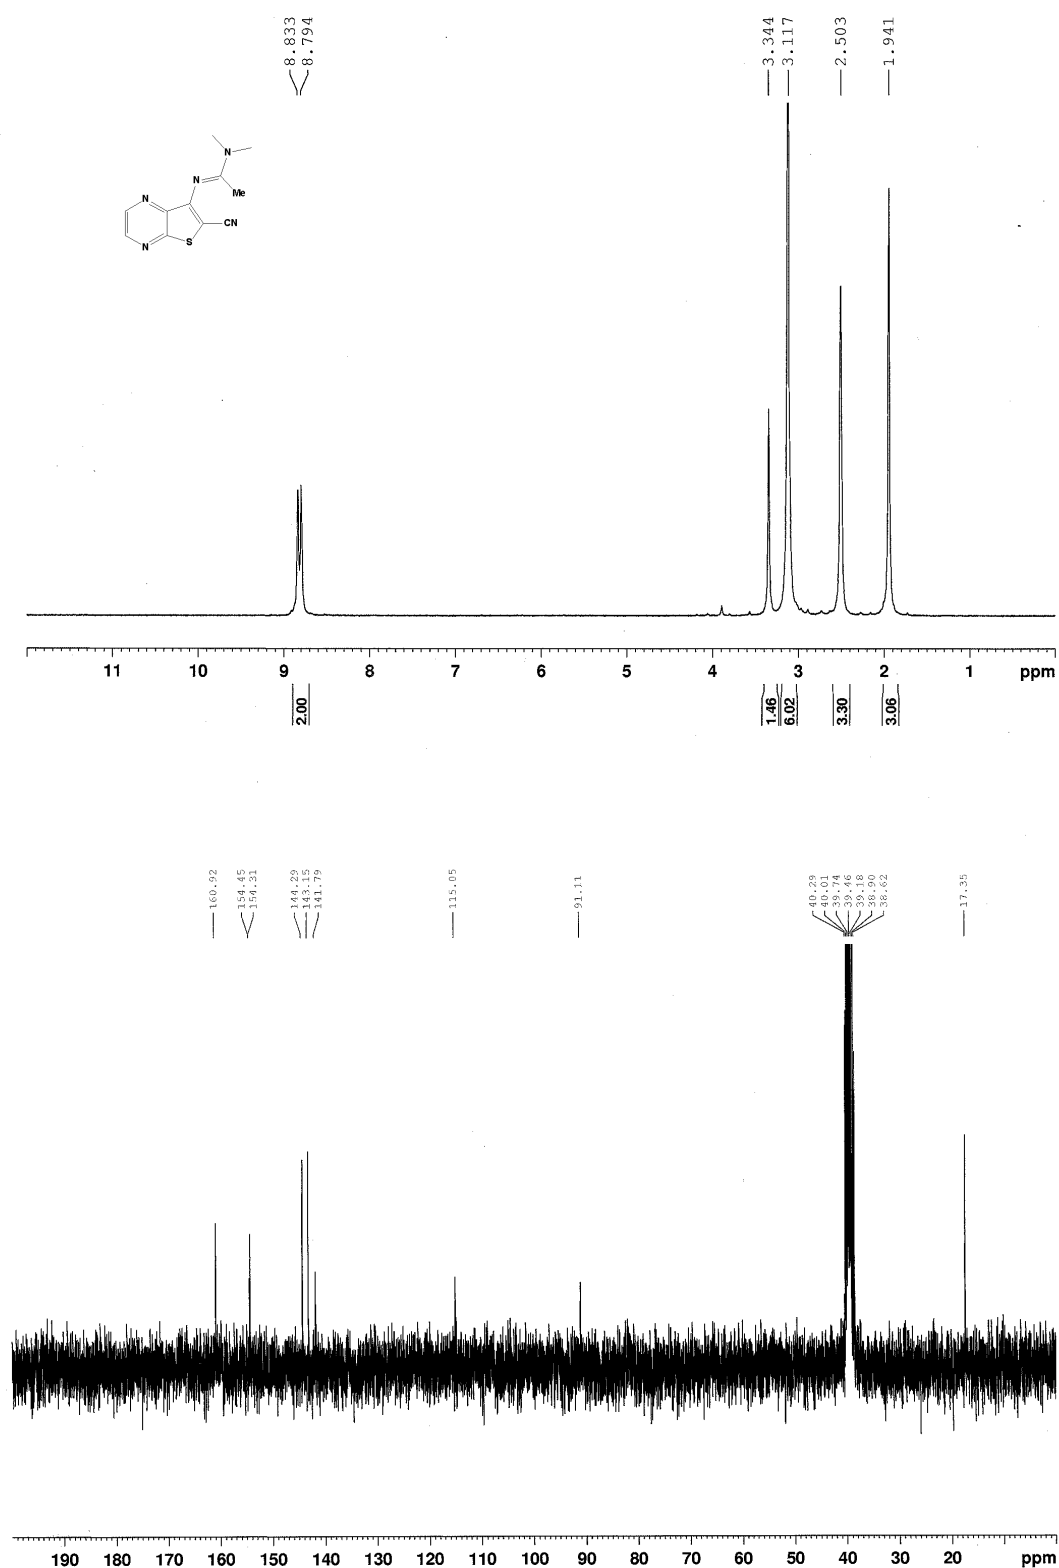30  
31

32 Figure S5. <sup>1</sup>H NMR at 300 MHz and <sup>13</sup>C NMR at 75.4 MHz spectra, DMSO-d<sub>6</sub>, for compound 3a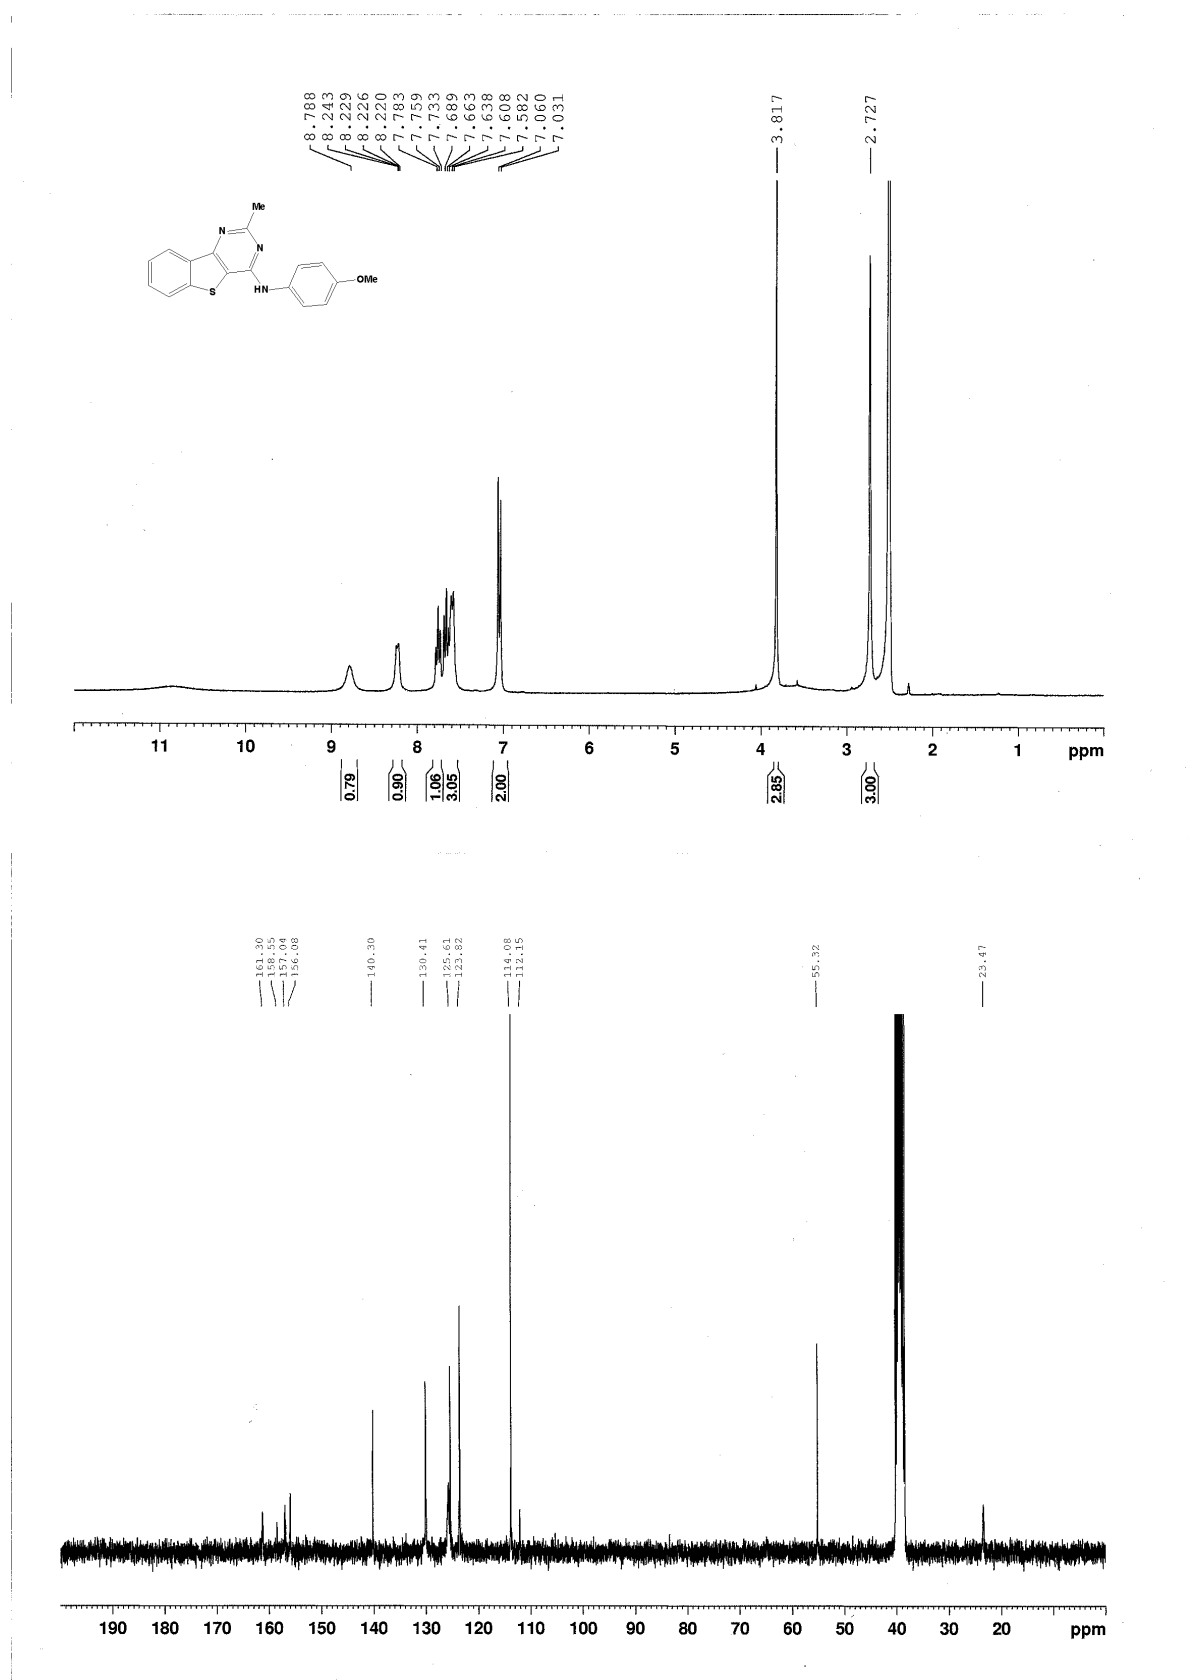

33

34

35 Figure S6. <sup>1</sup>H NMR at 300 MHz and <sup>13</sup>C NMR at 75.4 MHz spectra, DMSO-d<sub>6</sub>, for compound 3b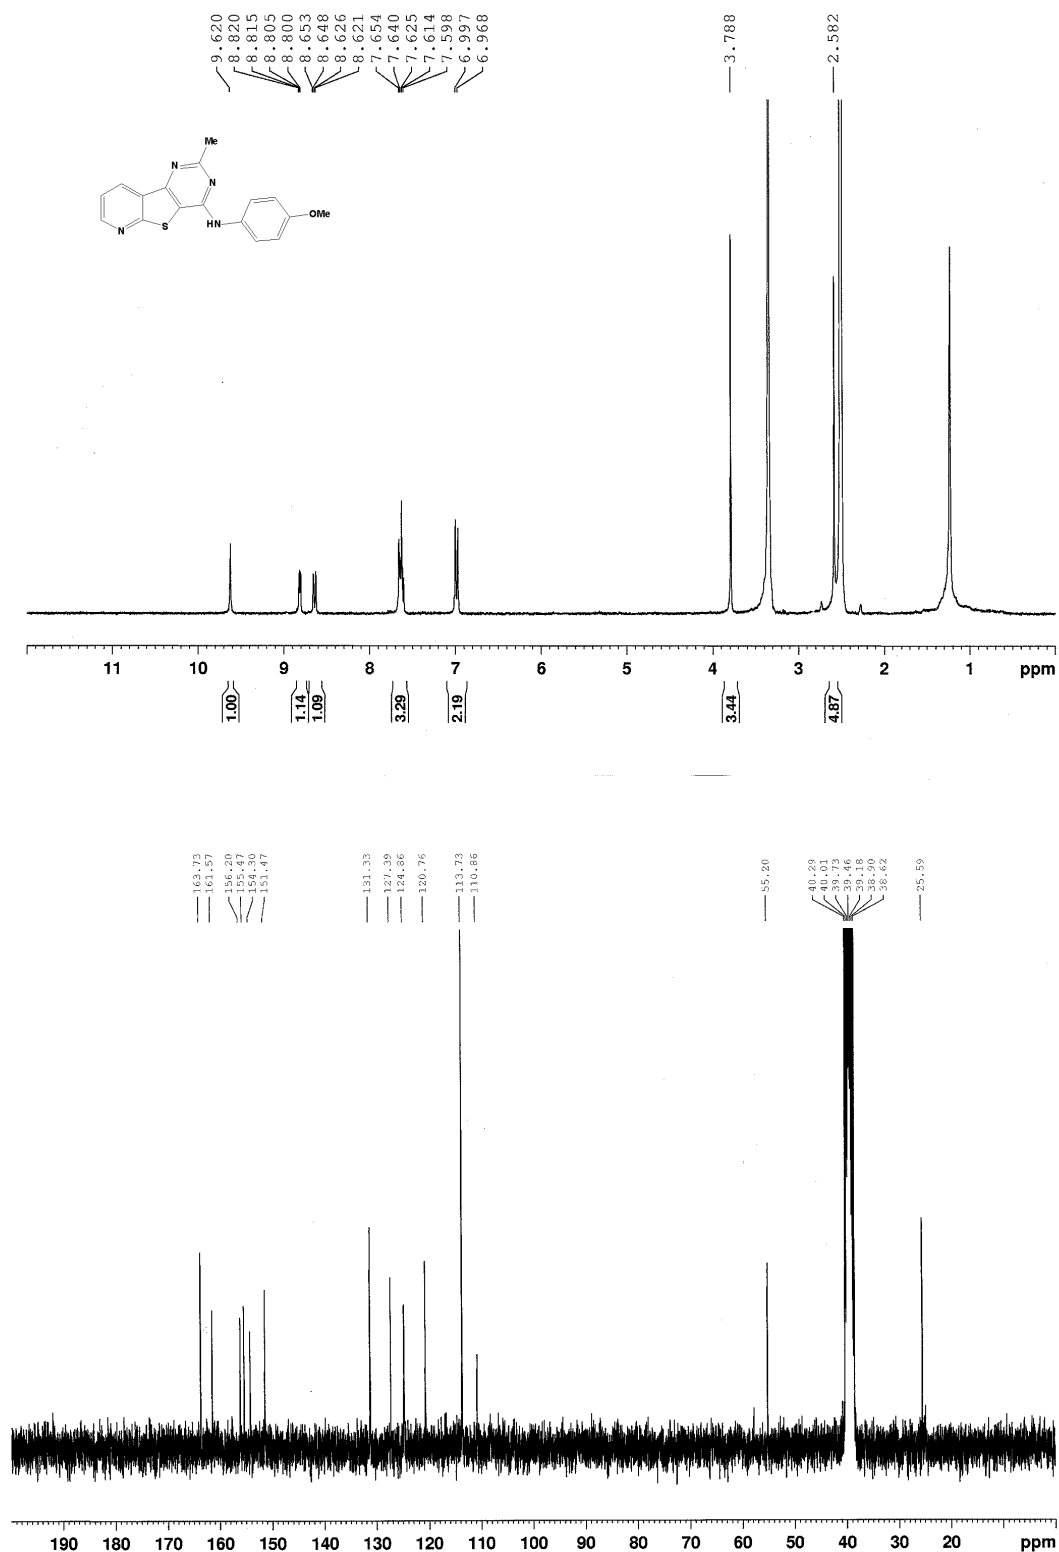

36

37

38 **Figure S7.** <sup>1</sup>H NMR at 300 MHz and <sup>13</sup>C NMR at 75.4 MHz spectra, DMSO-d<sub>6</sub>, for compound 3c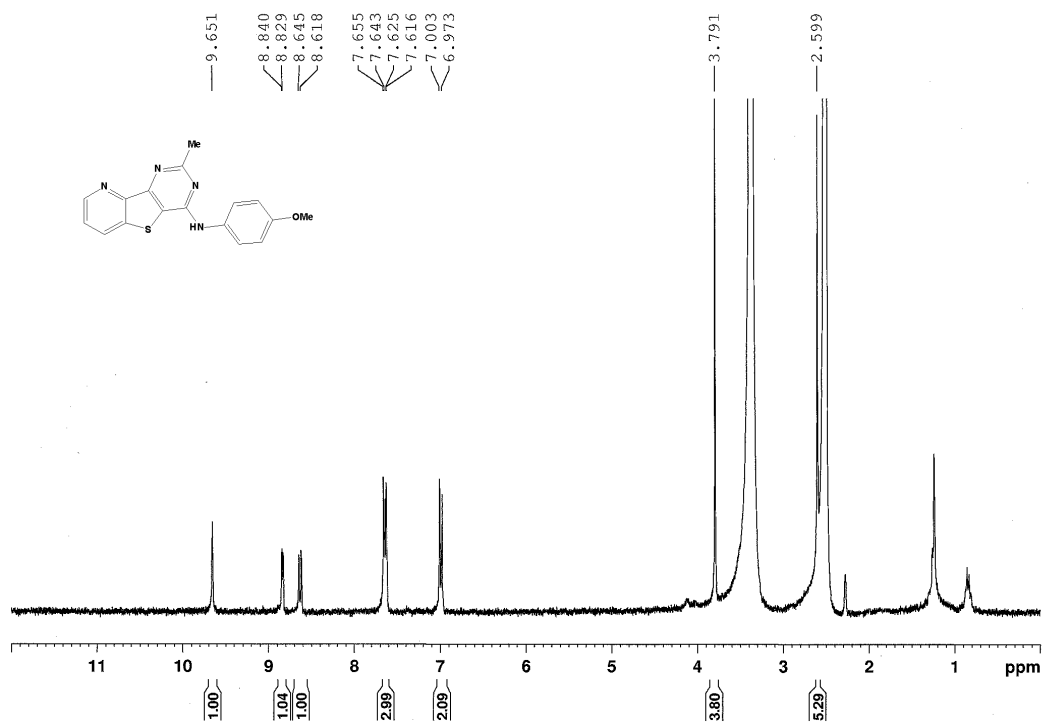

41 Figure S8. <sup>1</sup>H NMR at 300 MHz and <sup>13</sup>C NMR at 75.4 MHz spectra, DMSO-d<sub>6</sub>, for compound 3d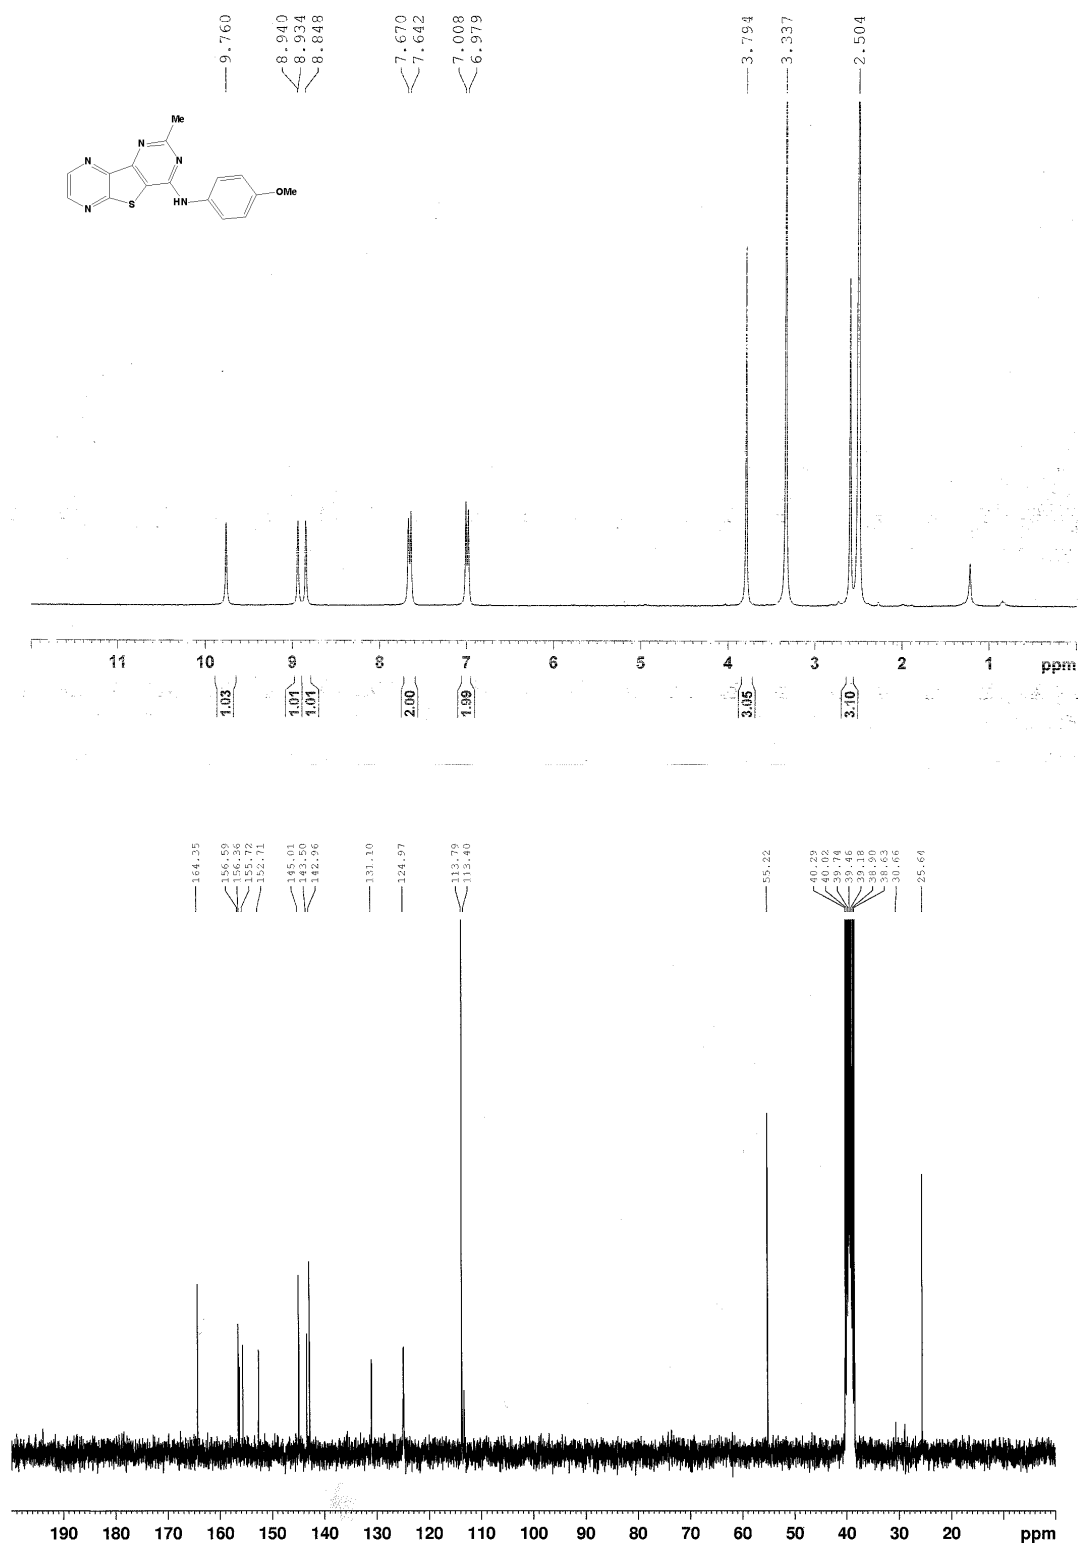

42

43

44 **Figure S9.** <sup>1</sup>H NMR at 300 MHz and <sup>13</sup>C NMR at 75.4 MHz spectra, DMSO-d<sub>6</sub>, for compound 4a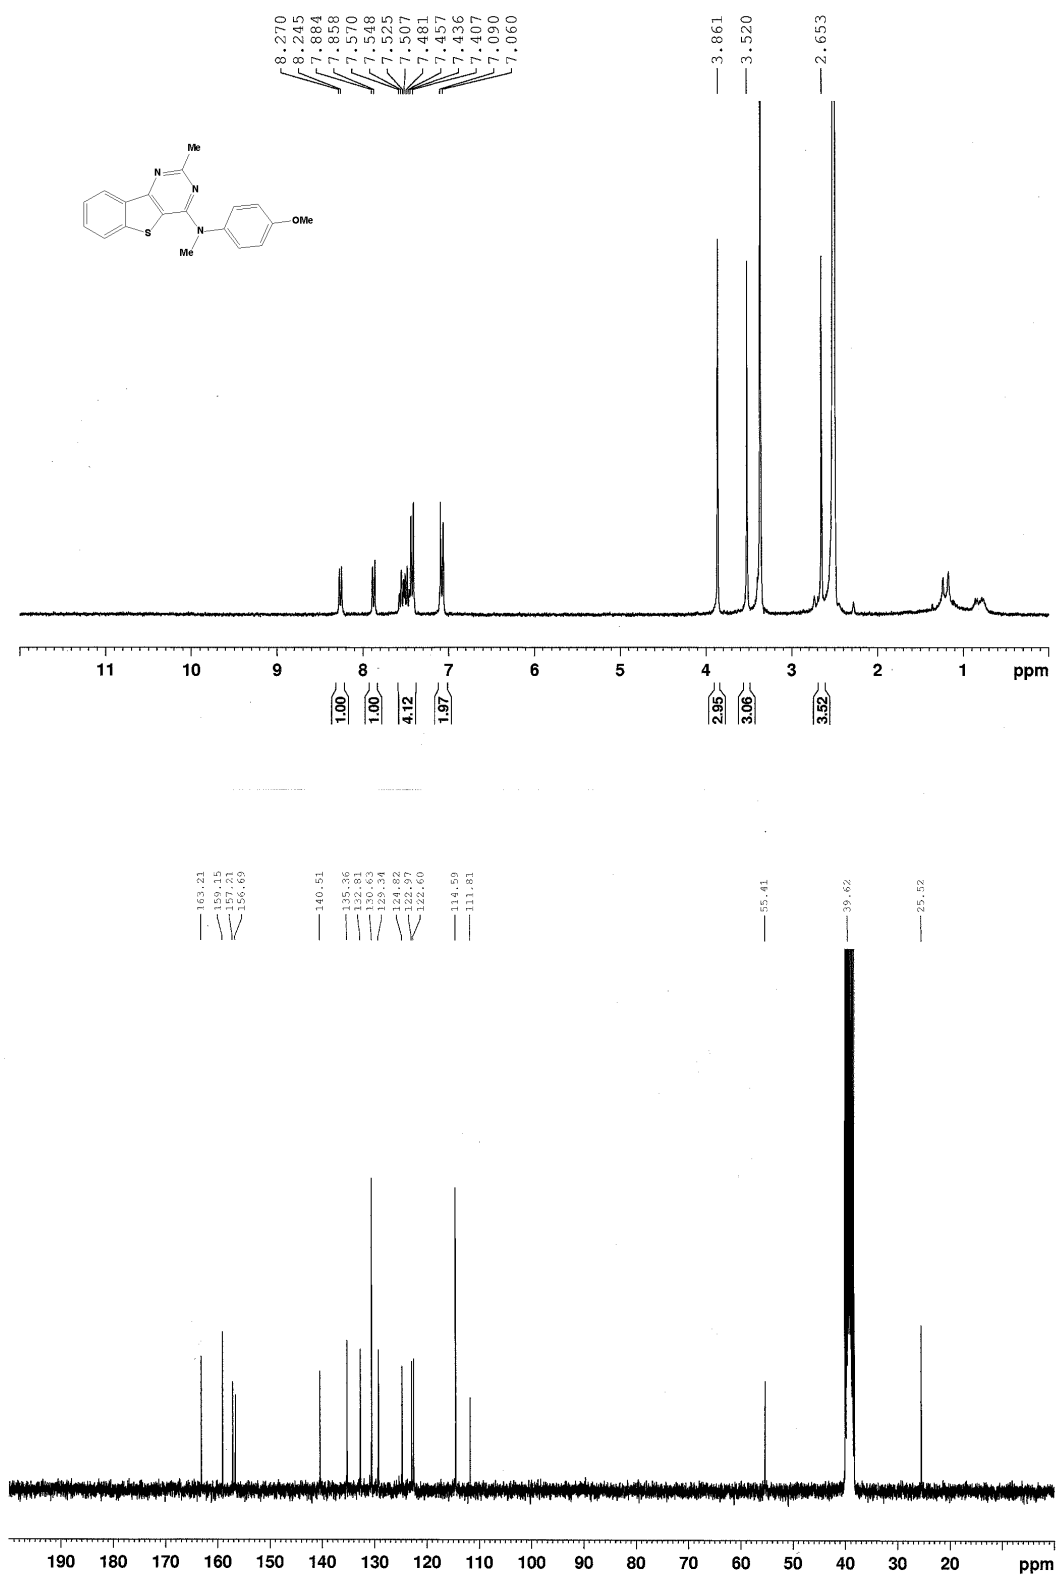

45

46

47 **Figure S10.**  $^1\text{H}$  NMR at 300 MHz and  $^{13}\text{C}$  NMR at 75.4 MHz spectra, DMSO- $d_6$ , for compound 4b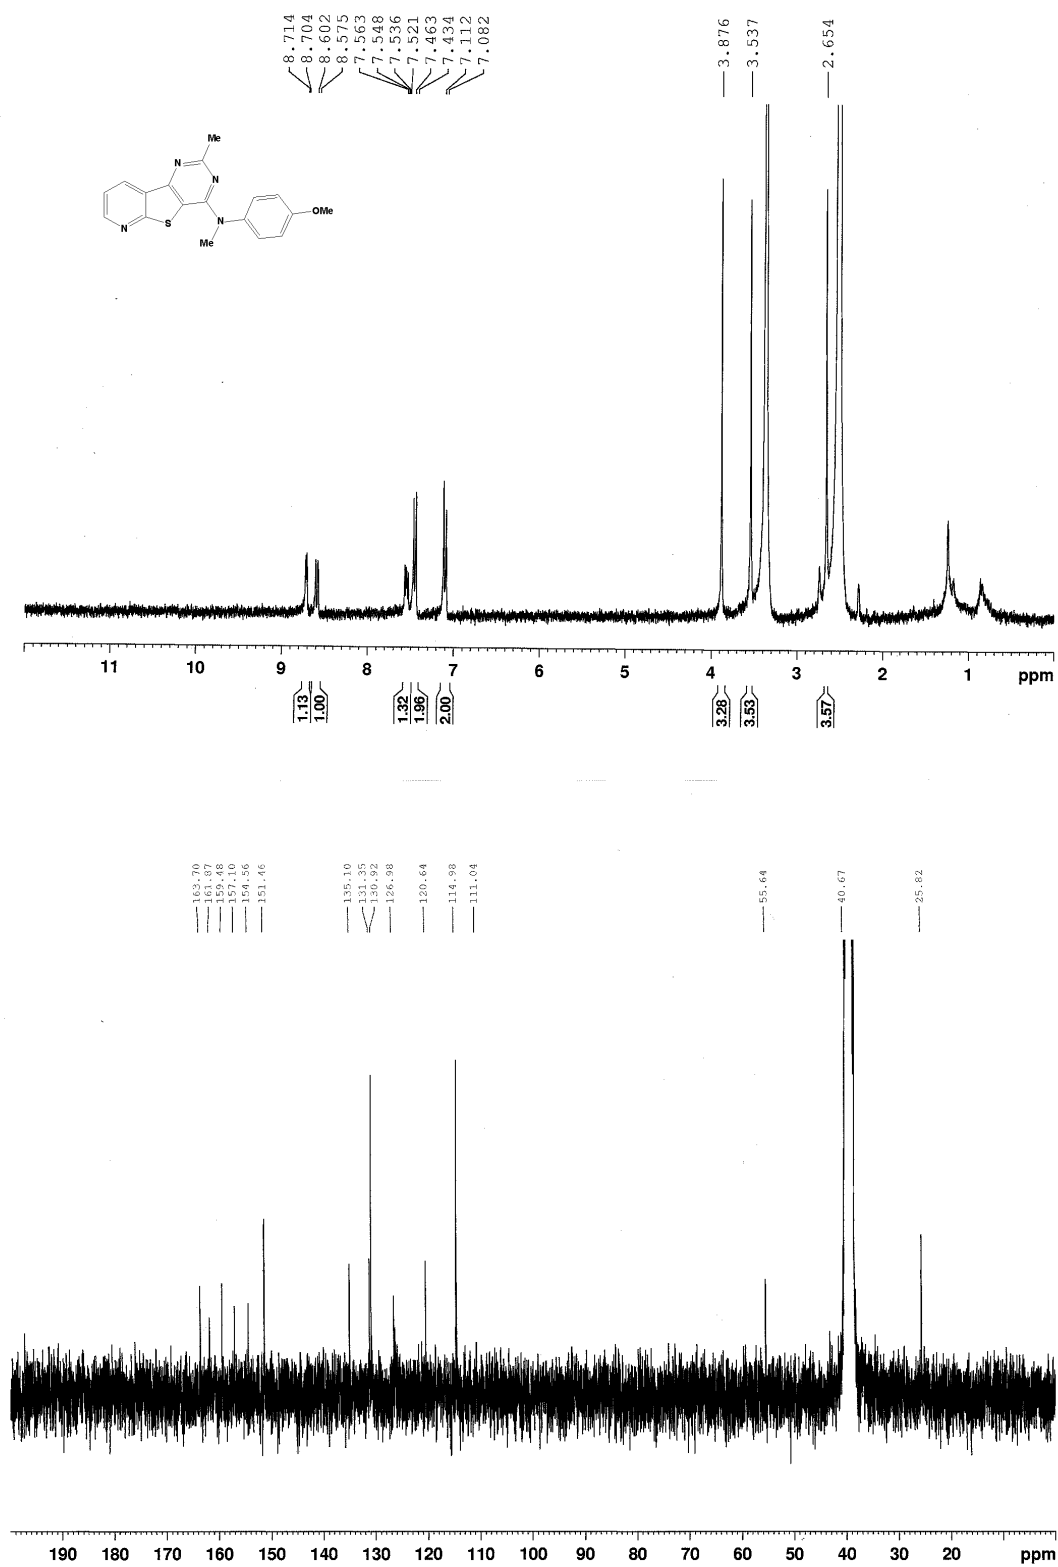

48

49

50 **Figure S11.** <sup>1</sup>H NMR at 300 MHz and <sup>13</sup>C NMR at 75.4 MHz spectra, DMSO-d<sub>6</sub>, for compound 4c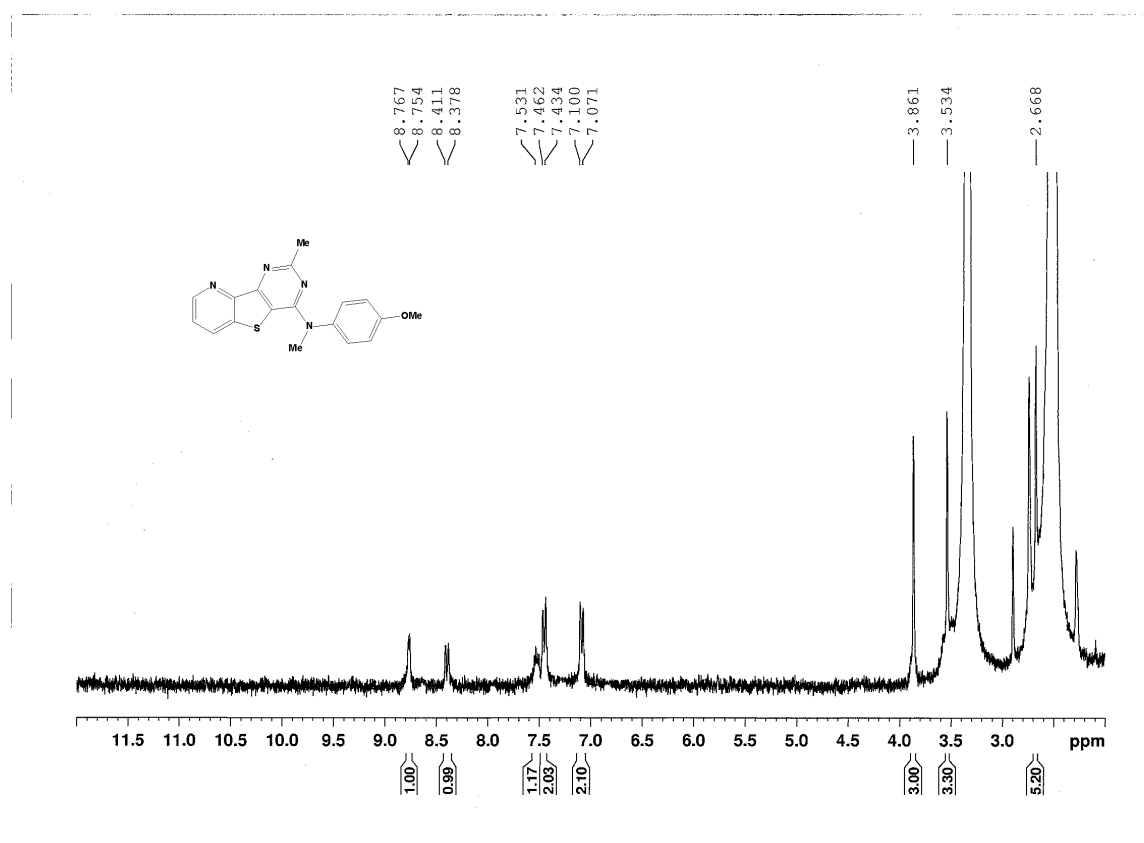51  
52  
53

54 **Figure S12.** <sup>1</sup>H NMR at 300 MHz and <sup>13</sup>C NMR at 75.4 MHz spectra, DMSO-d<sub>6</sub>, for compound 4d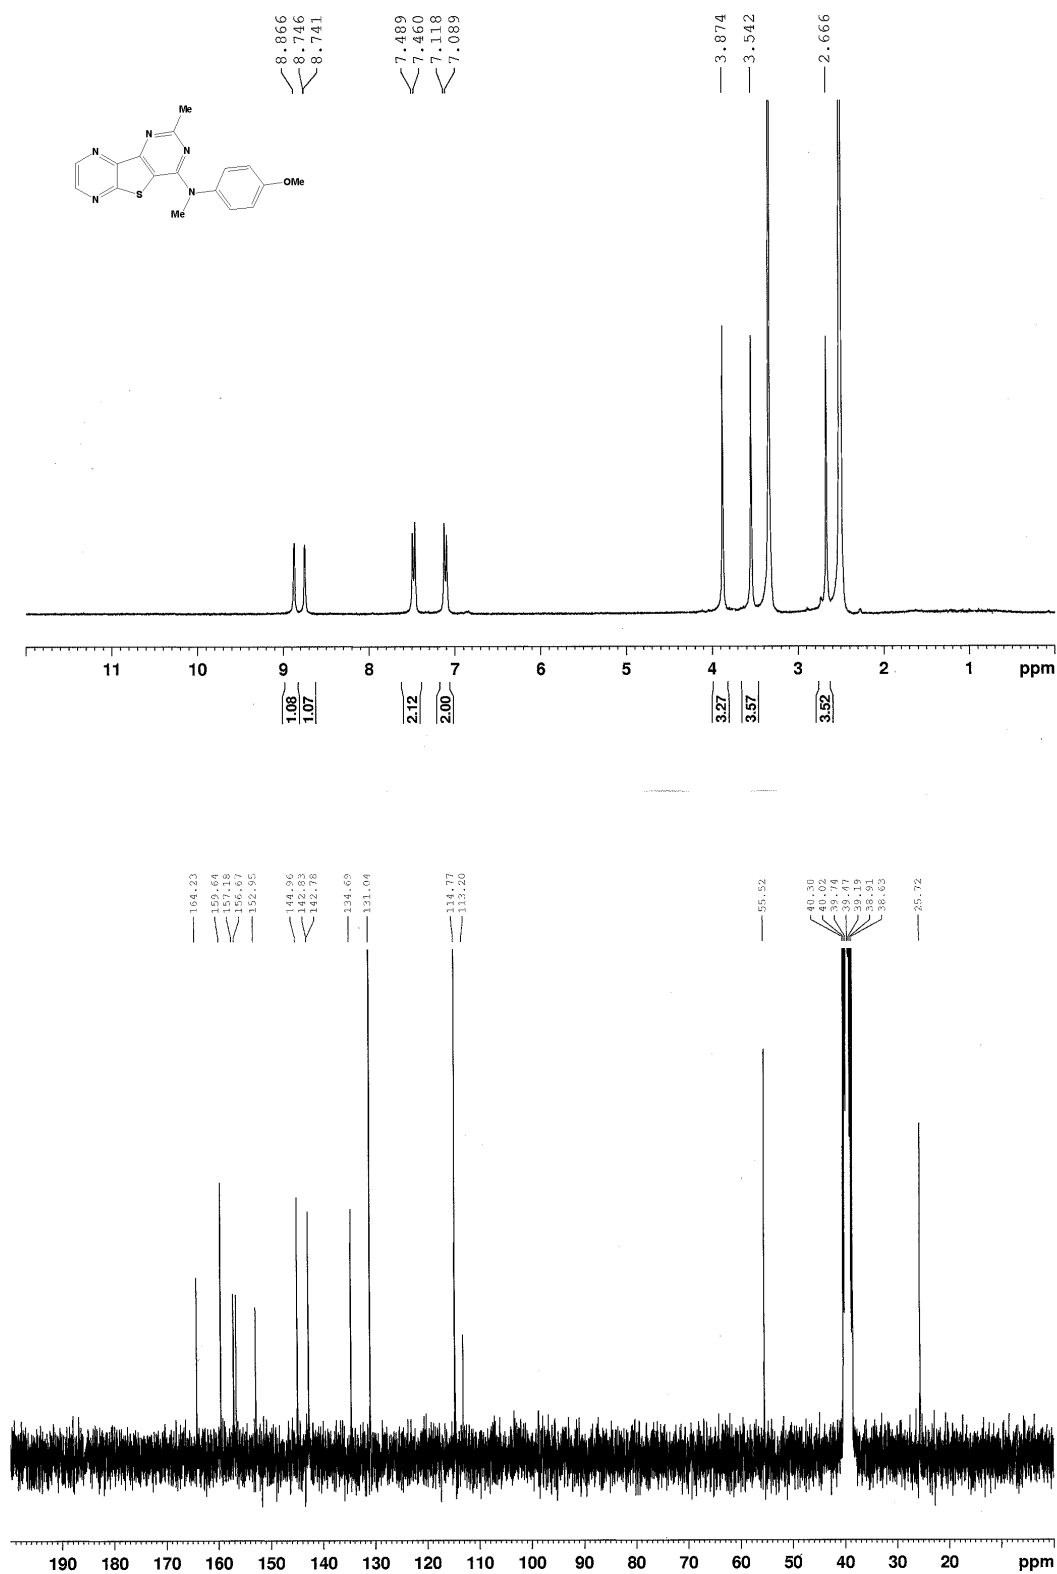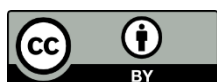

© 2020 by the authors. Submitted for possible open access publication under the terms and conditions of the Creative Commons Attribution (CC BY) license (<http://creativecommons.org/licenses/by/4.0/>).
